# Supplementary material
Source: PubMed Central journal article supplement (PMC3584897)

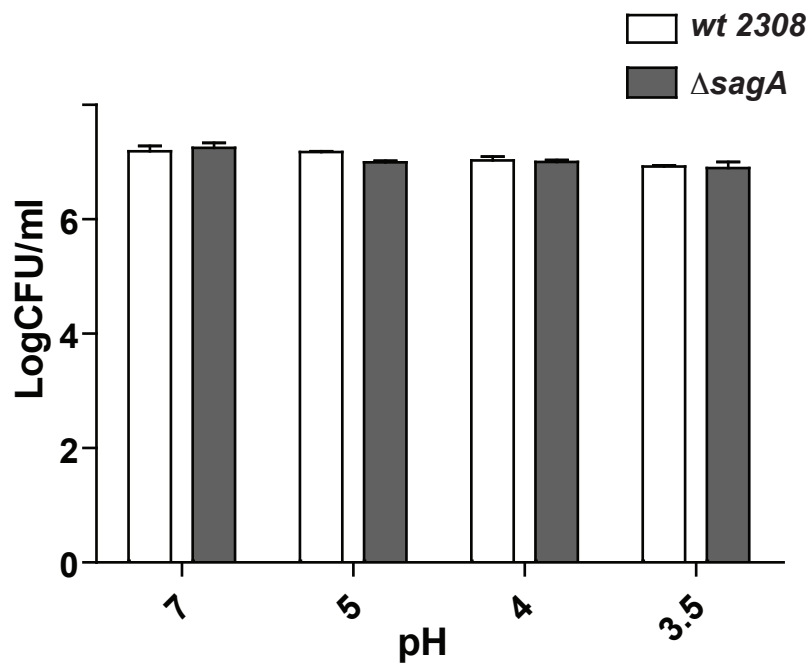

Supplementary Figure 1

Supplement: IAI.01158-12_zii999090039so2.pdf [file IAI.01158-12_zii999090039so2.pdf]

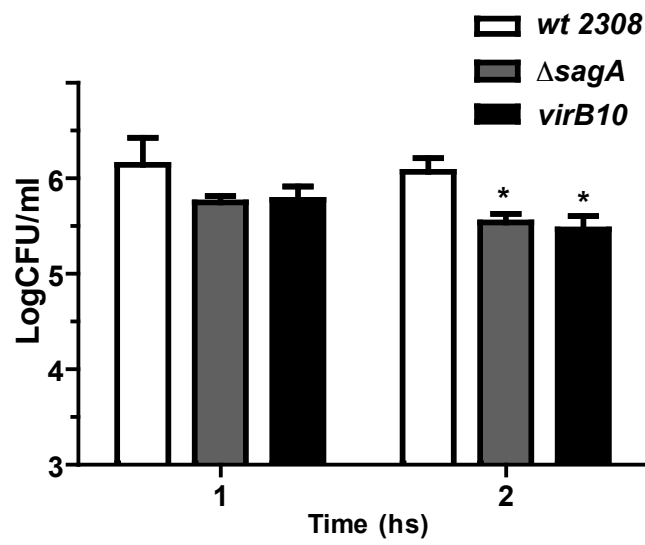

Supplementary Figure 2

Supplement: IAI.01158-12_zii999090039so3.pdf [file IAI.01158-12_zii999090039so3.pdf]
